# Supplementary material
Source: Springer Nature journal article supplement (https://www.springermedizin.de/resource/supplementary/12955_2010_700_MOESM2_ESM.pdf/9561134)
Supplement: MOESM2 [file 9561134]

LOGIT SCALE

PERSONS  
Less Independent

ITEMS  
More difficult to agree with  
(i.e., more difficult to respond Strongly Agree)

2

+

Give up control(4-5)

Feel like burden(4-5)  
Rearrange(4-5)

1

X

+

Frustrated(4-5)

X T  
X

Ask for help(4-5)

XXX T

Give up control(3-4)

XXX  
XXX

XXXXXXXX S S

XXXXXX

X

Rearrange(3-4)  
Feel like burden(3-4)

0

XXXX  
XXXXX

+M

Give up control(2-3)

XXXXXX

Frustrated(3-4)

XXXXXXXX

XXXXXXXXXXXX M

XXX S

Rearrange(2-3) Ask for help(3-4)  
Feel like burden(2-3)

XXXX

XXXXXX

Give up control(1-2)

XXXX

Frustrated(2-3)

T

XXXX

XX S

Ask for help(2-3)

X

Rearrange(1-2)

XX

Feel like burden(1-2)

XXXXXX

-1

XX

+

Frustrated(1-2)

X T

Ask for help(1-2)

X

X

-2

+

PERSONS  
More Independent

ITEMS  
Easier to agree with  
(i.e., easier to respond Strongly Agree)
